# Supplementary material
Source: publisher site journal article supplement (https://www.spandidos-publications.com/5231/downloadSupplementary)
Supplement: Supplementary file 1 [file downloadSupplementary]

## Sheet: Sheet1
Table SII. Significantly dysregulated pathways of microRNA-10b-5p transfected cells.
Ingenuity canonical pathways	P-value	Ratio	z-score	Molecules
Ovarian Cancer Signaling	2.57x10-4	0.0696	0	E2F2,E2F3,E2F5,HDAC11,LHB,PRKAR1B,PRKAR2A,RAP2A,SMO,TCF7,TCF7L2
Cell Cycle: G1/S Checkpoint Regulation	3.31x10-4	0.103	-0.378	CCND3,E2F2,E2F3,E2F5,HDAC11,MDM2,NRG1
MYC Mediated Apoptosis Signaling	3.80x10-4	0.12	-0.816	ADRB2,CRADD,MCL1,MDM2,PRKAR1B,PRKAR2A
Role of CHK Proteins in Cell Cycle Checkpoint Control	7.76x10-4	0.105	-0.447	E2F2,E2F3,E2F5,NBN,PPP2R1B,SLC19A1
Chronic Myeloid Leukemia Signaling	1.10x10-3	0.0748	NaN	CCND3,CRK,E2F2,E2F3,E2F5,HDAC11,MDM2,RAP2A
Tyrosine Biosynthesis IV	1.10x10-3	0.667	NaN	PCBD1,PCBD2
Molecular Mechanisms of Cancer	1.20x10-3	0.0425	NaN	ARHGEF9,BMP4,CCND3,CDK19,CRK,E2F2,E2F3,E2F5,H2BW2,HDAC11,MDM2,NBN,NLK,PRKAR1B,PRKAR2A,RAP2A,RBPJ,RHOB,SMO
Regulation Of The Epithelial Mesenchymal Transition In Development Pathway	1.45x10-3	0.0805	2	AXIN2,JAG1,PYGO2,RBPJ,SMO,TCF7,TCF7L2
Phenylalanine Degradation I (Aerobic)	2.19x10-3	0.5	NaN	PCBD1,PCBD2
Glioma Signaling	2.82x10-3	0.0645	NaN	CAMK1D,CCND3,E2F2,E2F3,E2F5,HDAC11,MDM2,RAP2A
Myo-inositol Biosynthesis	3.55x10-3	0.4	NaN	BPNT2,IMPA2
Dopamine Receptor Signaling	4.17x10-3	0.0759	NaN	PCBD1,PPP1CC,PPP1R14C,PPP2R1B,PRKAR1B,PRKAR2A
Role of BRCA1 in DNA Damage Response	4.47x10-3	0.075	-1.342	E2F2,E2F3,E2F5,FANCC,NBN,SLC19A1
Adipogenesis pathway	4.68x10-3	0.0593	NaN	BMP4,GTF2H1,GTF2H2,HDAC11,PER2,RPS6KA1,SMO,TCF7
Cell Cycle Regulation by BTG Family Proteins	5.50x10-3	0.108	NaN	E2F2,E2F3,E2F5,PPP2R1B
Cyclins and Cell Cycle Regulation	5.75x10-3	0.0714	0.447	CCND3,E2F2,E2F3,E2F5,HDAC11,PPP2R1B
Insulin Receptor Signaling	5.89x10-3	0.0571	0	CRK,GRB10,H2BW2,PPP1CC,PPP1R14C,PRKAR1B,PRKAR2A,RAP2A
WNT/β-catenin Signaling	6.61x10-3	0.052	-0.378	AXIN2,H2BW2,MDM2,NLK,PPP2R1B,SMO,SOX4,TCF7,TCF7L2
CDK5 Signaling	6.61x10-3	0.0614	0.378	CABLES1,PPP1CC,PPP1R14C,PPP2R1B,PRKAR1B,PRKAR2A,RAP2A
Bladder Cancer Signaling	7.24x10-3	0.0603	NaN	CXCL8,E2F2,E2F3,E2F5,HDAC11,MDM2,RAP2A
Non-Small Cell Lung Cancer Signaling	9.77x10-3	0.0638	NaN	CCND3,E2F2,E2F3,E2F5,HDAC11,RAP2A
Estrogen-mediated S-phase Entry	1.32x10-2	0.115	NaN	E2F2,E2F3,E2F5
Regulation of the Epithelial-Mesenchymal Transition Pathway	1.38x10-2	0.0462	NaN	HMGA2,JAG1,MET,PYGO2,RAP2A,RBPJ,SMO,TCF7,TCF7L2
NER (Nucleotide Excision Repair, Enhanced Pathway)	1.48x10-2	0.0583	0	ERCC5,GTF2H1,GTF2H2,H3-3A/H3-3B,H4C14,SLC19A1
Sonic Hedgehog Signaling	1.78x10-2	0.103	NaN	PRKAR1B,PRKAR2A,SMO
Glioblastoma Multiforme Signaling	1.82x10-2	0.0468	0	CCND3,E2F2,E2F3,E2F5,MDM2,RAP2A,RHOB,SMO
Kinetochore Metaphase Signaling Pathway	2.04x10-2	0.0541	1.633	BOD1,H2AC18/H2AC19,PPP1CC,PPP1R14C,SKA1,STAG2
Prostate Cancer Signaling	2.14x10-2	0.0536	NaN	E2F2,E2F3,E2F5,HDAC11,MDM2,RAP2A
ERK/MAPK Signaling	2.34x10-2	0.0421	-1	CRK,H3-3A/H3-3B,PPP1CC,PPP1R14C,PPP2R1B,PRKAR1B,PRKAR2A,RAP2A,RPS6KA1
Pulmonary Fibrosis Idiopathic Signaling Pathway	2.51x10-2	0.0368	1.155	COL13A1,COL15A1,COL5A2,JAG1,PRKN,RAP2A,RBPJ,RPS6KA1,SMO,TCF7,TCF7L2,WWTR1
Protein Kinase A Signaling	2.75x10-2	0.0344	-0.577	H1-10,H2BW2,H3-3A/H3-3B,MTMR3,PDE6B,PPP1CC,PPP1R14C,PRKAR1B,PRKAR2A,PTPN13,PTPN14,SMO,TCF7,TCF7L2
DNA Double-Strand Break Repair by Non-Homologous End Joining	2.88x10-2	0.143	NaN	NBN,XRCC4
Role of IL-17A in Psoriasis	2.88x10-2	0.143	NaN	CXCL1,CXCL8
DNA Methylation and Transcriptional Repression Signaling	2.95x10-2	0.0857	NaN	DNMT3B,H3-3A/H3-3B,H4C14
Pyrimidine Ribonucleotides Interconversion	2.95x10-2	0.0857	NaN	AK4,CMPK1,NUDT15
Nucleotide Excision Repair Pathway	2.95x10-2	0.0857	NaN	ERCC5,GTF2H1,GTF2H2
3-phosphoinositide Degradation	3.24x10-2	0.0419	0	MTMR3,MTMR6,NUDT15,PPP1CC,PPP1R14C,PPP2R1B,PTPMT1,PTPN13
Pyrimidine Ribonucleotides De Novo Biosynthesis	3.39x10-2	0.0811	NaN	AK4,CMPK1,NUDT15
D-myo-inositol (1,4,5)-trisphosphate Degradation	3.72x10-2	0.125	NaN	BPNT2,IMPA2
Parkinson's Signaling	3.72x10-2	0.125	NaN	PRKN,SEPTIN5
Melanocyte Development and Pigmentation Signaling	3.80x10-2	0.0521	-0.447	CRK,PRKAR1B,PRKAR2A,RAP2A,RPS6KA1
Small Cell Lung Cancer Signaling	3.80x10-2	0.0521	NaN	CCND3,E2F2,E2F3,E2F5,HDAC11
β-alanine Degradation I	3.80x10-2	0.5	NaN	ABAT
All-trans-decaprenyl Diphosphate Biosynthesis	3.80x10-2	0.5	NaN	PDSS1
Flavin Biosynthesis IV (Mammalian)	3.80x10-2	0.5	NaN	RFK
Cardiolipin Biosynthesis II	3.80x10-2	0.5	NaN	PTPMT1
Putrescine Biosynthesis III	3.80x10-2	0.5	NaN	AZIN2
Synaptic Long Term Potentiation	3.89x10-2	0.0465	-0.816	PPP1CC,PPP1R14C,PRKAR1B,PRKAR2A,RAP2A,RPS6KA1
Breast Cancer Regulation by Stathmin1	3.98x10-2	0.0304	0.243	ADRB2,ARHGEF9,BDKRB2,CAMK1D,CCND3,E2F2,E2F3,E2F5,GPR137C,GPR3,PPP1CC,PPP1R14C,PPP2R1B,PRKAR1B,PRKAR2A,RAP2A,SMO,STMN1
Pulmonary Healing Signaling Pathway	3.98x10-2	0.0402	2.121	BMP4,JAG1,RAP2A,RBPJ,SMO,TCF7,TCF7L2,WWTR1
ATM Signaling	3.98x10-2	0.0515	-1	CBX5,MDM2,NBN,PPP1CC,PPP2R1B
Synaptogenesis Signaling Pathway	4.17x10-2	0.035	0.302	CDH11,CLASP2,CRK,EFNA3,EFNB3,EPHA2,MAP1B,PRKAR1B,PRKAR2A,RAB3A,RAP2A
